# Supplementary material for: Studies on the effect of bio-ionic liquid structures on the spontaneous reduction and dispersion stability of graphene oxide in aqueous media
Source: Royal Society of Chemistry journal article supplement (doi:10.1039/c4ra05552g), 2014-01-01
Supplement: c4ra05552g1.pdf [file c4ra05552g1.pdf]

## Electronic supporting information

### 1 Studies on the affect of bio-ionic liquid structures on the 2 spontaneous reduction and dispersion stability of graphene oxide 3 in aqueous media

4 Mukesh Sharma,<sup>a</sup> Dibyendu Mondal,<sup>a</sup> Chandrakant Mukesh,<sup>a</sup> and Kamalesh Prasad<sup>a,b</sup> \*

5  
6 <sup>a</sup> AcSIR- Central Salt & Marine Chemicals Research Institute, G. B Marg, Bhavnagar-364002  
7 (Gujarat), India

8 <sup>b</sup> Marine Biotechnology and Ecology Discipline, CSIR-Central Salt & Marine Chemicals Research  
9 Institute, G. B Marg, Bhavnagar-364002 (Gujarat), India, Phone No : +91-278-2567760. Fax No.  
10 +91-278-2567562 Email: kamlesh@csmcri.org / drkamaleshp@gmail.com]

11

12

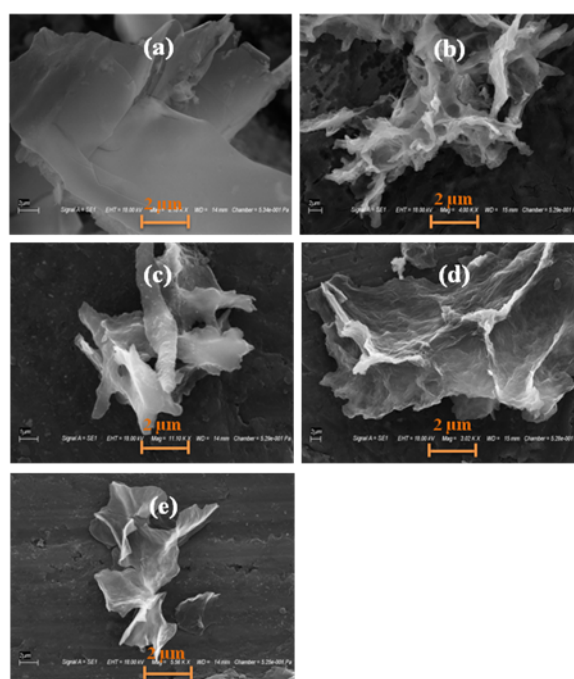

13

14 **Fig. S1:** SEM images of (a) pristine HGO and GO modified with (b) choline bicarbonate, (c)  
15 choline hydroxide, (d) choline formate and (e) choline caproate.

## Electronic supporting information

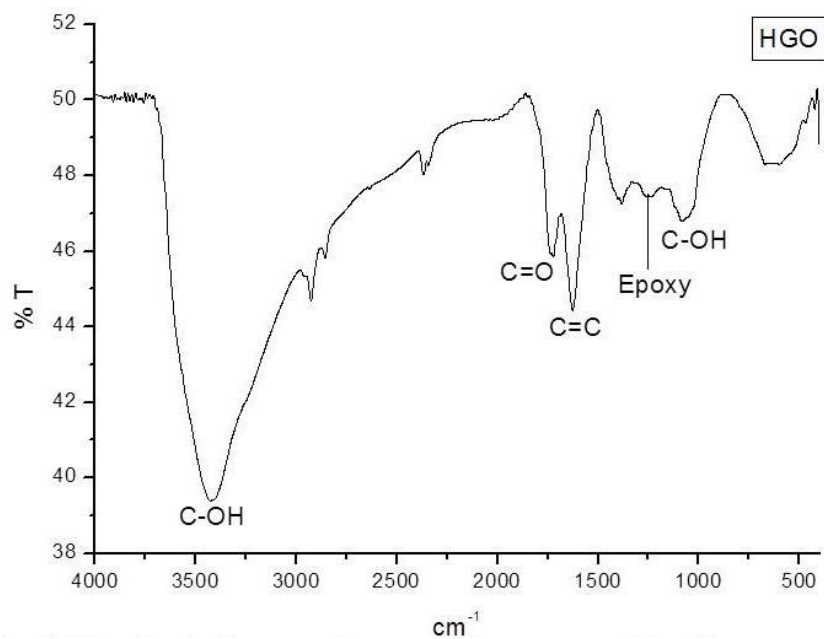

16

**Fig. S2** : FT-IR of pristine graphene oxide prepared by Hummers method (HGO)

17

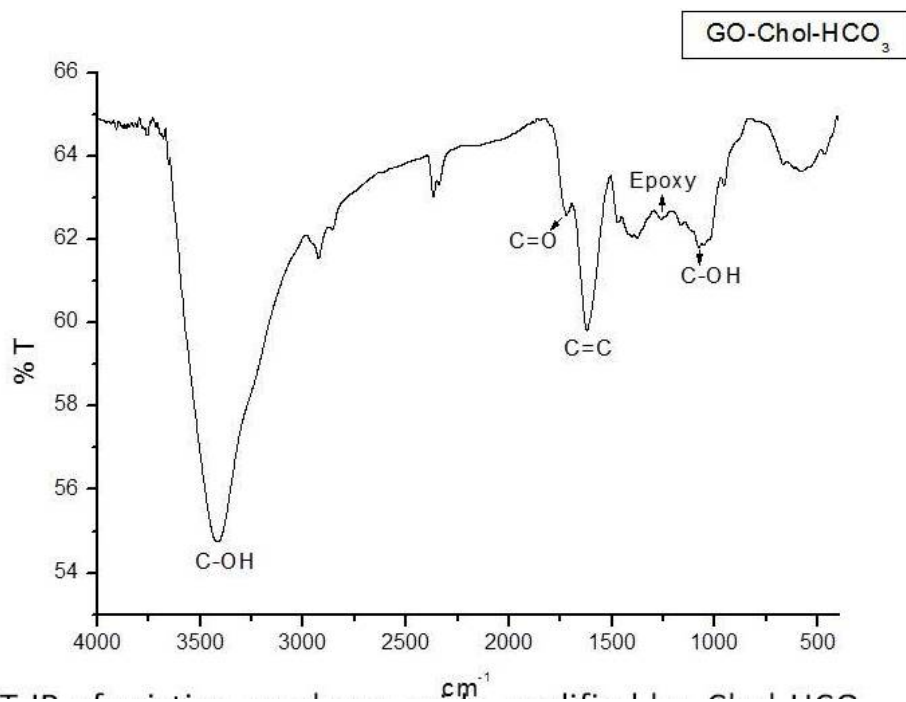

18

19

**Fig. S3** : FT-IR of pristine graphene oxide modified by Chol-HCO<sub>3</sub>

20

21

Electronic supporting information

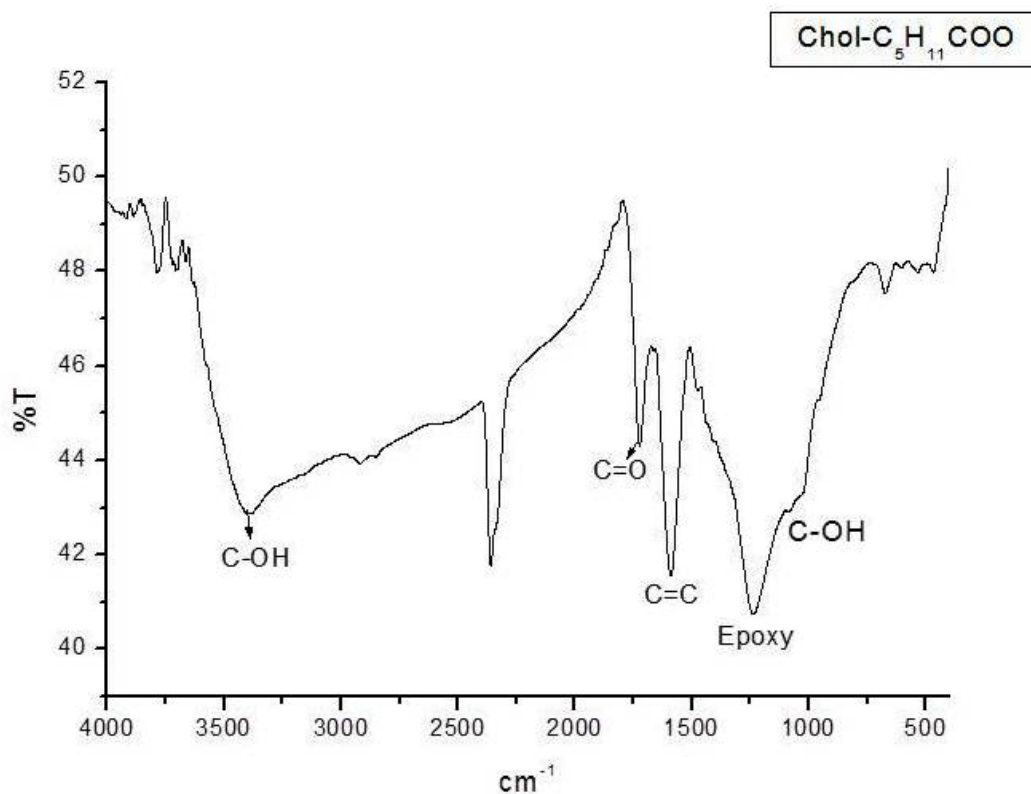

22

23

**Fig. S4** : FT-IR of pristine graphene oxide modified by Chol-C<sub>5</sub>H<sub>11</sub>COO

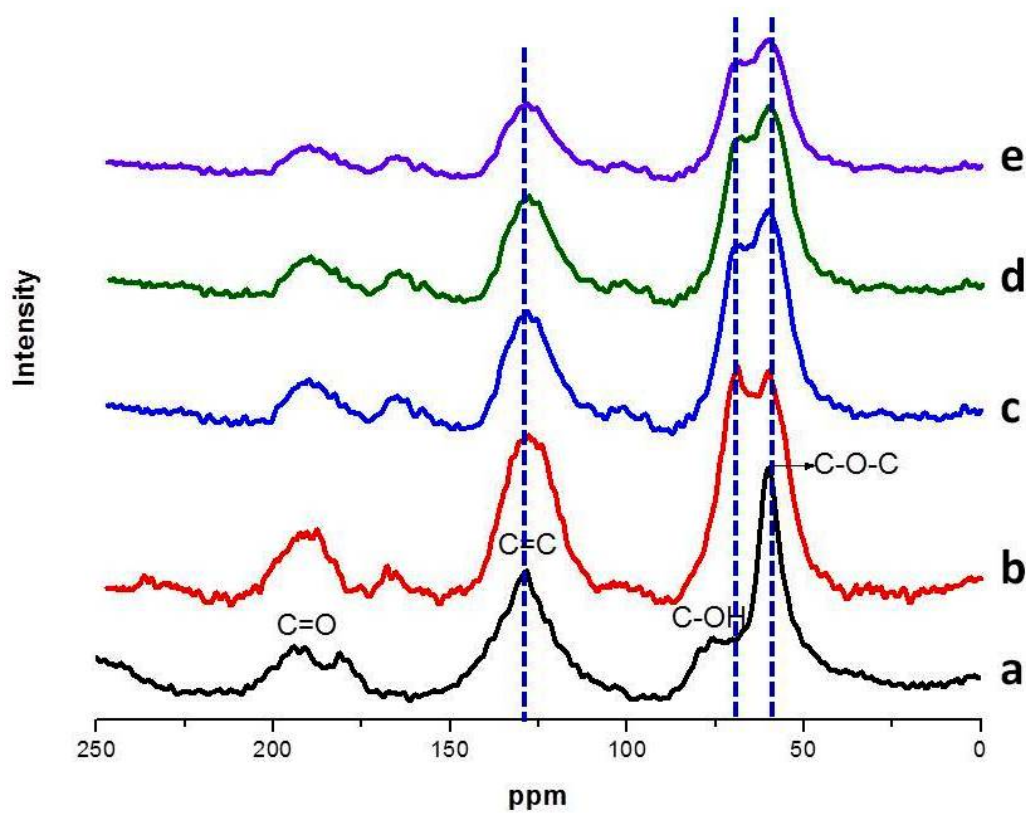

24

25

26

**Fig. S5** : SSNMR of (a) pristine HGO and GO modified by (b) Chol-OH (c) Chol-HCO<sub>3</sub> (d) chol-HCOO and (e) chol-C<sub>5</sub>H<sub>11</sub>COO

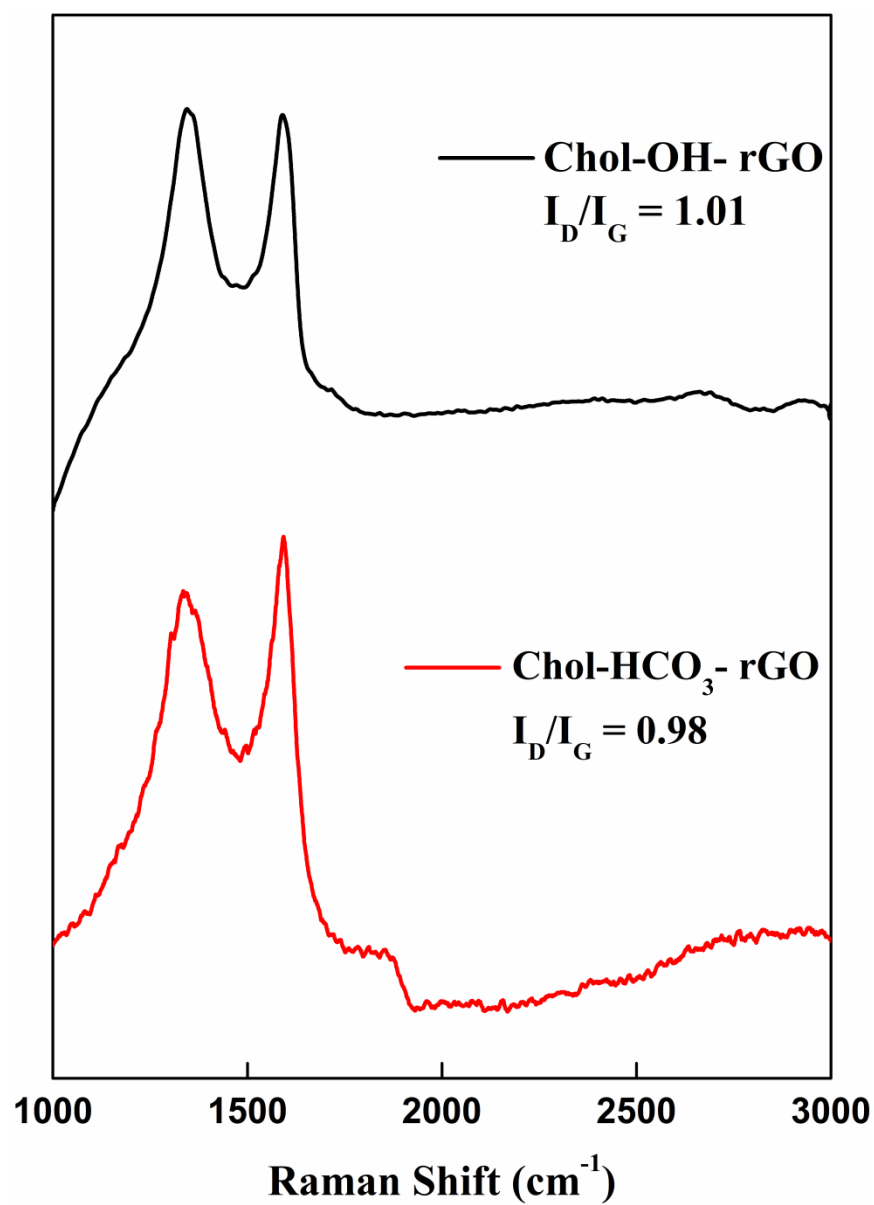

27  
28  
29  
30  
31  
32  
33  
34  
35  
36  
37  
38  
39  
40

**Fig. S6** : GO functionalized by chol-OH (black) and GO functionalized by chol-HCO<sub>3</sub> (Red).

## Electronic supporting information

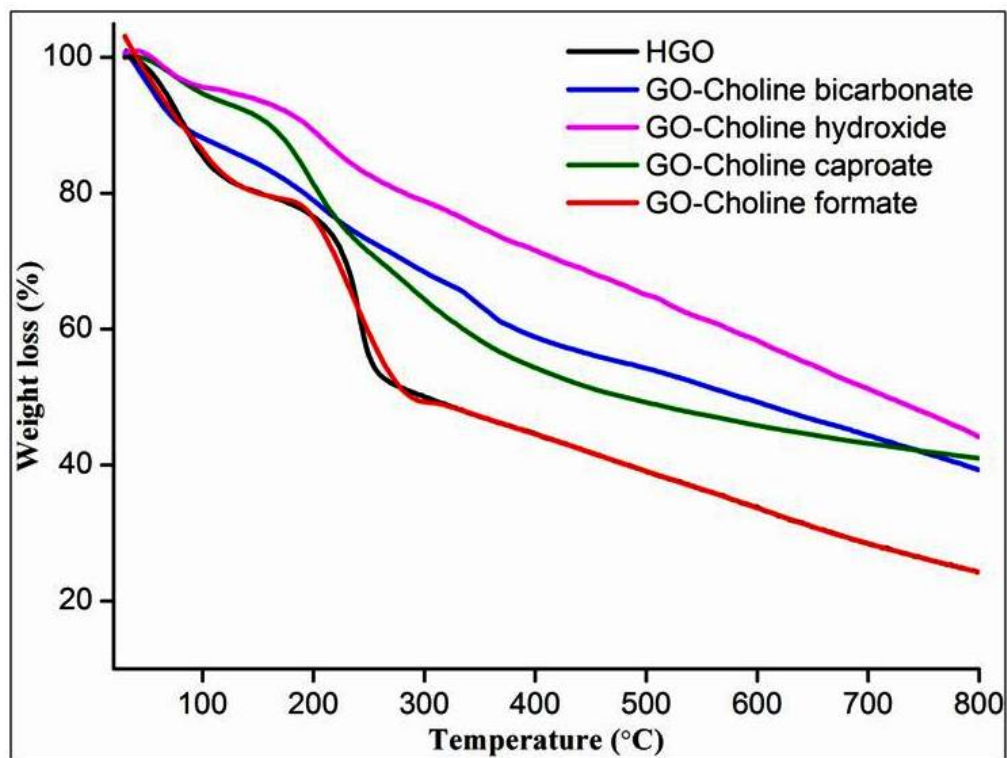

41  
42 Fig. S7 : TGA of HGO and IL functionalized GO  
43  
44  
45  
46  
47  
48  
49  
50  
51  
52  
53  
54

## Electronic supporting information

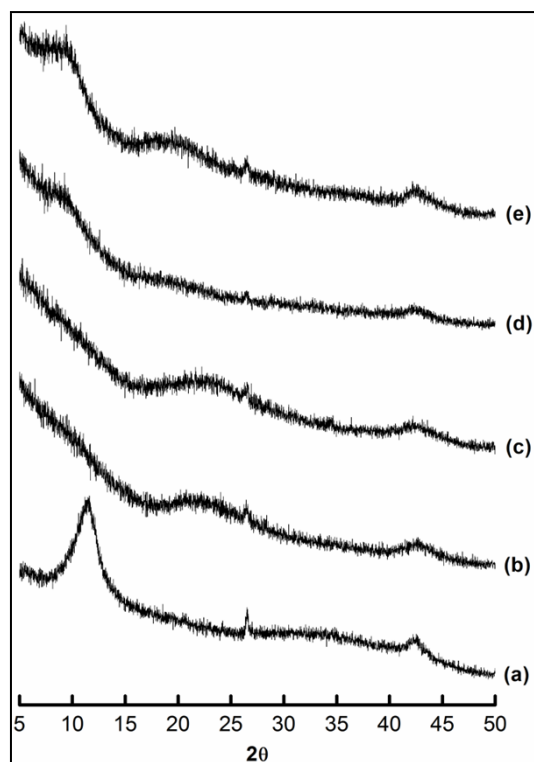

55

56 **Fig. S8:** Powder x-ray diffraction pattern of (a) pristine HGO, modified GO with (b) choline  
57 bicarbonate (c) choline hydroxide (d) choline caproate and (e) choline formate.

58

59

## Electronic supporting information

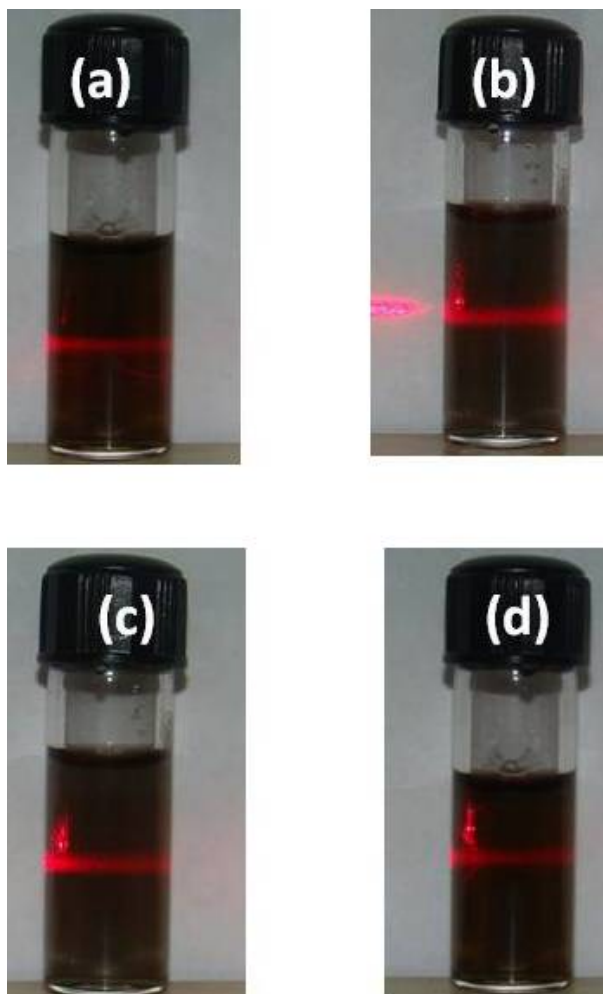

60

61

62

63

64

65

66 **Fig. S9** : Tyndall effect shown in GO functionalized with (a) choline formate and (b) choline  
67 caproate at 0 days. Tyndall effect shown in GO functionalized with (c) choline formate and  
68 (d) choline caproate after 365 days

69

70

71

## Electronic supporting information

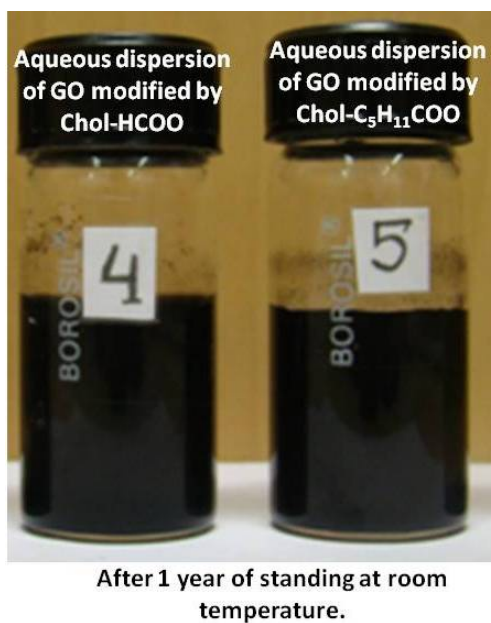

72

73 Fig. S10: Long term dispersion stability of GO modified by ILs.

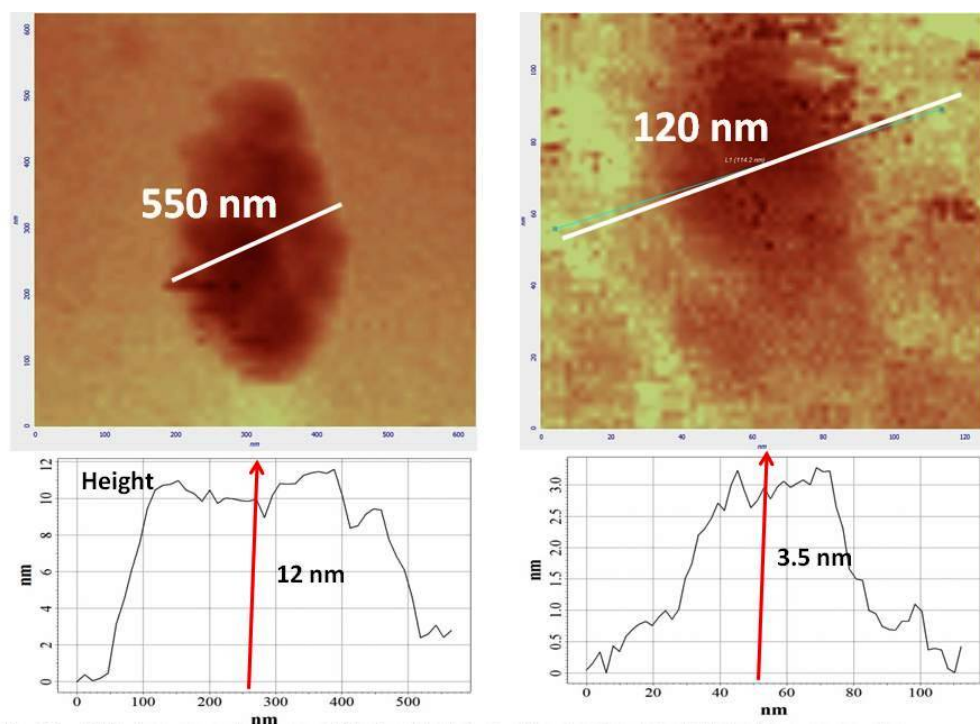

74

75 Fig. S11: AFM images of GO functionalized with (a) choline hydroxide (b) choline caproate

76

77



## Electronic supporting information

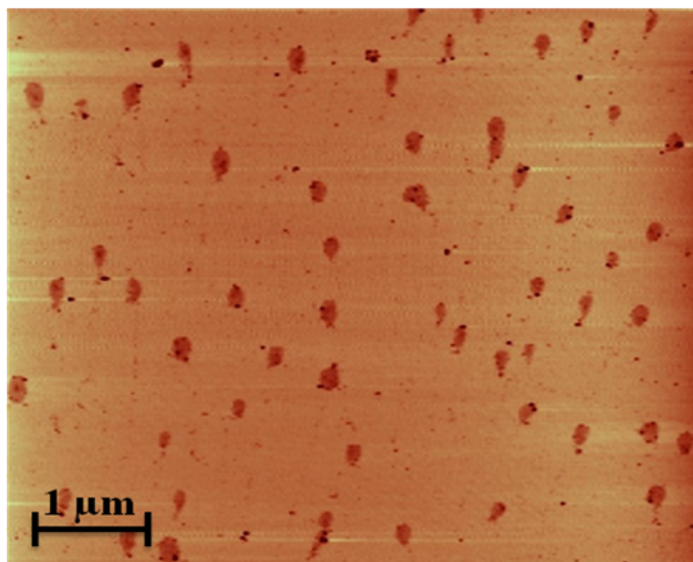

78

79

80 **Fig. S12:** AFM images of dispersed GO functionalized with choline bicarbonate.

81

82

83

84
